# Supplementary material for: Yeast EndoG prevents genome instability by degrading extranuclear DNA species
Source: PubMed Central journal article supplement — Nat Commun. 2024 Sep 3;15:7653. doi: 10.1038/s41467-024-52147-2 (PMC11372161; doi:10.1038/s41467-024-52147-2), 2024-09-03
Supplement: 41467_2024_52147_MOESM1_ESM.pdf [file 41467_2024_52147_MOESM1_ESM.pdf]

## Supplementary Information

### Yeast EndoG prevents genome instability by degrading extranuclear DNA species

Yang Yu<sup>1#</sup>, Xin Wang<sup>2,3#</sup>, Jordan Fox<sup>1#</sup>, Ruofan Yu<sup>1,4</sup>, Pilendra Thakre<sup>1</sup>, Brenna McCauley<sup>4</sup>, Nicolas Nikoloutsos<sup>4,5</sup>, Yang Yu<sup>2,3</sup>, Qian Li<sup>1</sup>, P. J. Hastings<sup>1</sup>, Weiwei Dang<sup>1,4</sup>, Kaifu Chen<sup>2,3\*</sup>, Grzegorz Ira<sup>1\*</sup>

<sup>1</sup> Baylor College of Medicine, Department of Molecular and Human Genetics, One Baylor Plaza, Houston, TX 77030, USA

<sup>2</sup> Department of Cardiology, Boston Children's Hospital, 300 Longwood Avenue, Boston, MA 02115, USA

<sup>3</sup> Department of Pediatrics, Harvard Medical School, 25 Shattuck Street, Boston, MA 02115, USA

<sup>4</sup> Huffington Center on Aging, Baylor College of Medicine, One Baylor Plaza, Houston, TX 77030, USA

<sup>5</sup> Department of Bioengineering, Rice University, 6500 Main Street, Houston, TX 77030, USA

# - equal contribution

Correspondence:

Grzegorz Ira, e-mail: [gira@bcm.edu](mailto:gira@bcm.edu)

Kaifu Chen, e-mail: [Kaifu.Chen@childrens.harvard.edu](mailto:Kaifu.Chen@childrens.harvard.edu)

- 1. Supplementary Figures 1-7**
- 2. Supplementary Tables 1-2  
Supplementary References**

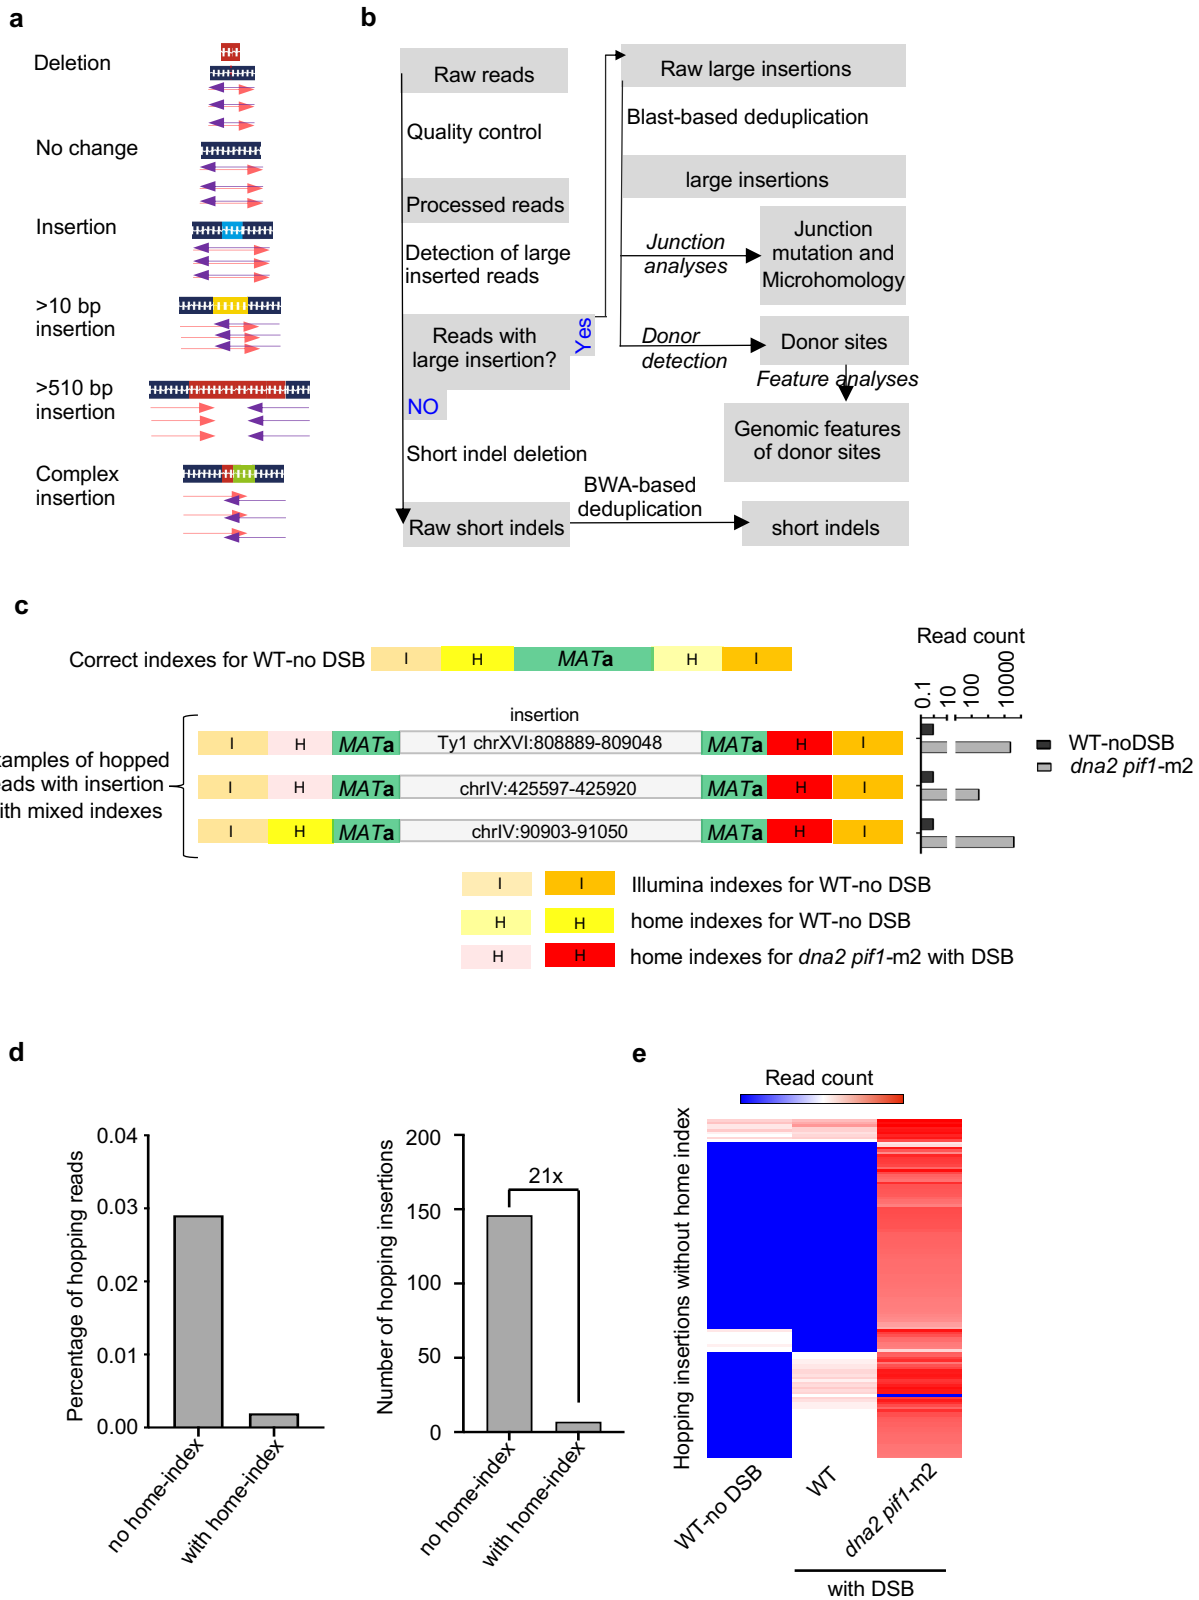

## Supplementary Figure 1. *Break-Ins* method for analysis of templated insertions

**a**, Schematic showing different types of sequence variation at DSB.

**b**, Flowchart showing the computational pipeline for detecting different types of sequence variation at DSB.

**c**, An example of cross-sample contamination indicated by index hopping during amplicon sequencing by MiSeq. Three examples show reads that have Illumina indexes specific for the DNA sample from a wild-type no DSB control but carry insertions. These reads can be eliminated by analysis of secondary home indexes. Number of false insertion reads in wild-type compared to same insertion reads in *dna2Δ pif1-m2* is shown on the right.

**d**, Comparison of read hopping identified based on MiSeq amplicon sequencing with and without home indexes.

**e**, Number of hopped reads without home index in single sequencing run. Source data are provided as a Source Data file.

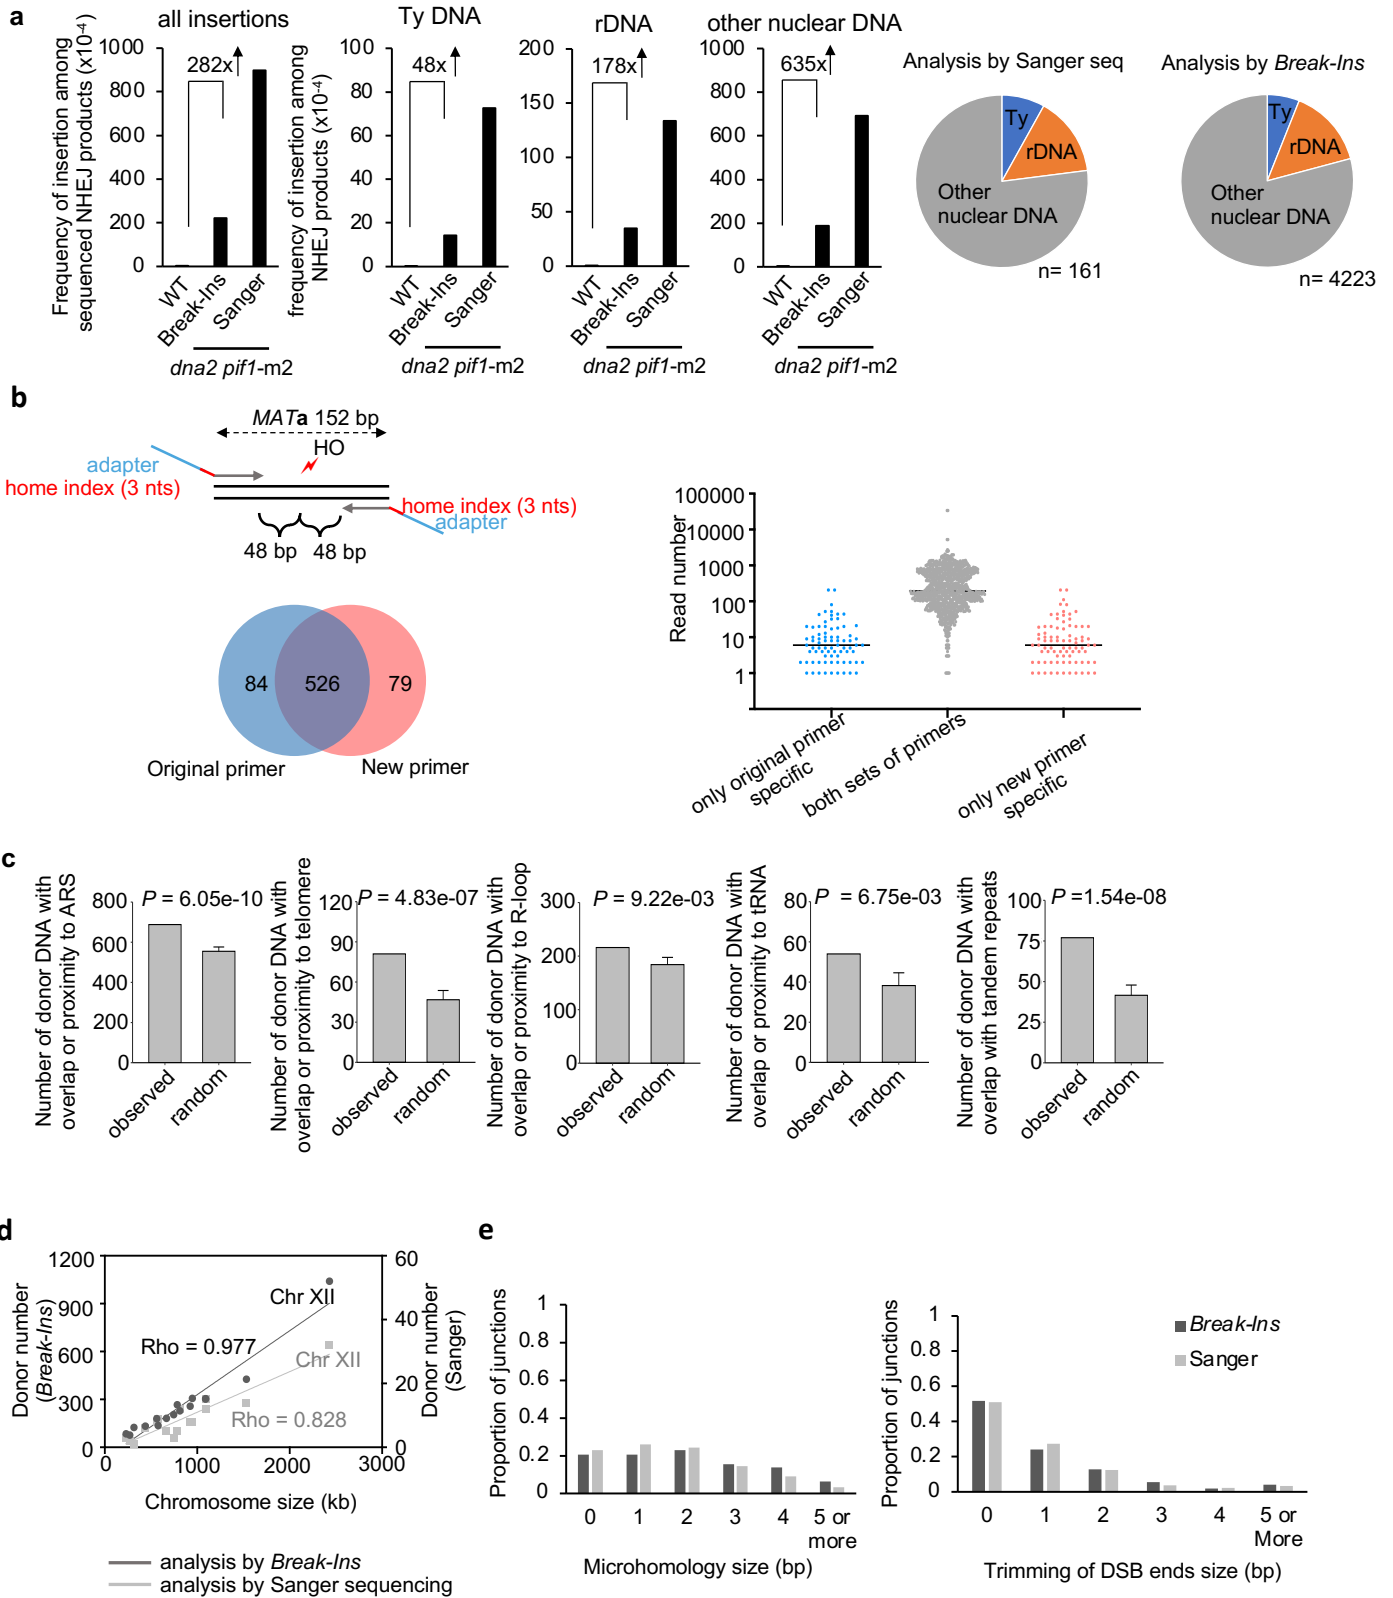

## **Supplementary Figure 2. Comparison of Sanger sequencing and *Break-Ins* analysis**

**a**, Frequency and types of DNA inserted at DSBs in wild-type or *dna2Δ pif1-m2*, (n – number of NHEJ products tested is shown in Supplementary Data 1). Sanger sequencing data are taken from previous publication<sup>23</sup>.

**b**, Comparison of *Break-Ins* analysis done with two different primer sets. Scheme showing primer position with respect to DSB ends and number of insertions identified by both or just one set of primers (left panel). Original primer set is shown in Figure **1b**. Most of the unique insertions are represented by low read number (right panel).

**c**, Analysis of features of DNA inserted from nuclear genome at DSBs in *dna2Δ pif1-m2*. P values were calculated using one-sided permutation test. Proximity is defined as sequence within 1 kb from ARS or telomere and within 0.2 kb from tRNA or R-loop.

**d**, Distribution of donor DNA per chromosome.

**e**, Analysis of microhomology and DSB ends trimming at insertion junctions in *dna2Δ pif1-m2*. Source data are provided as a Source Data file.

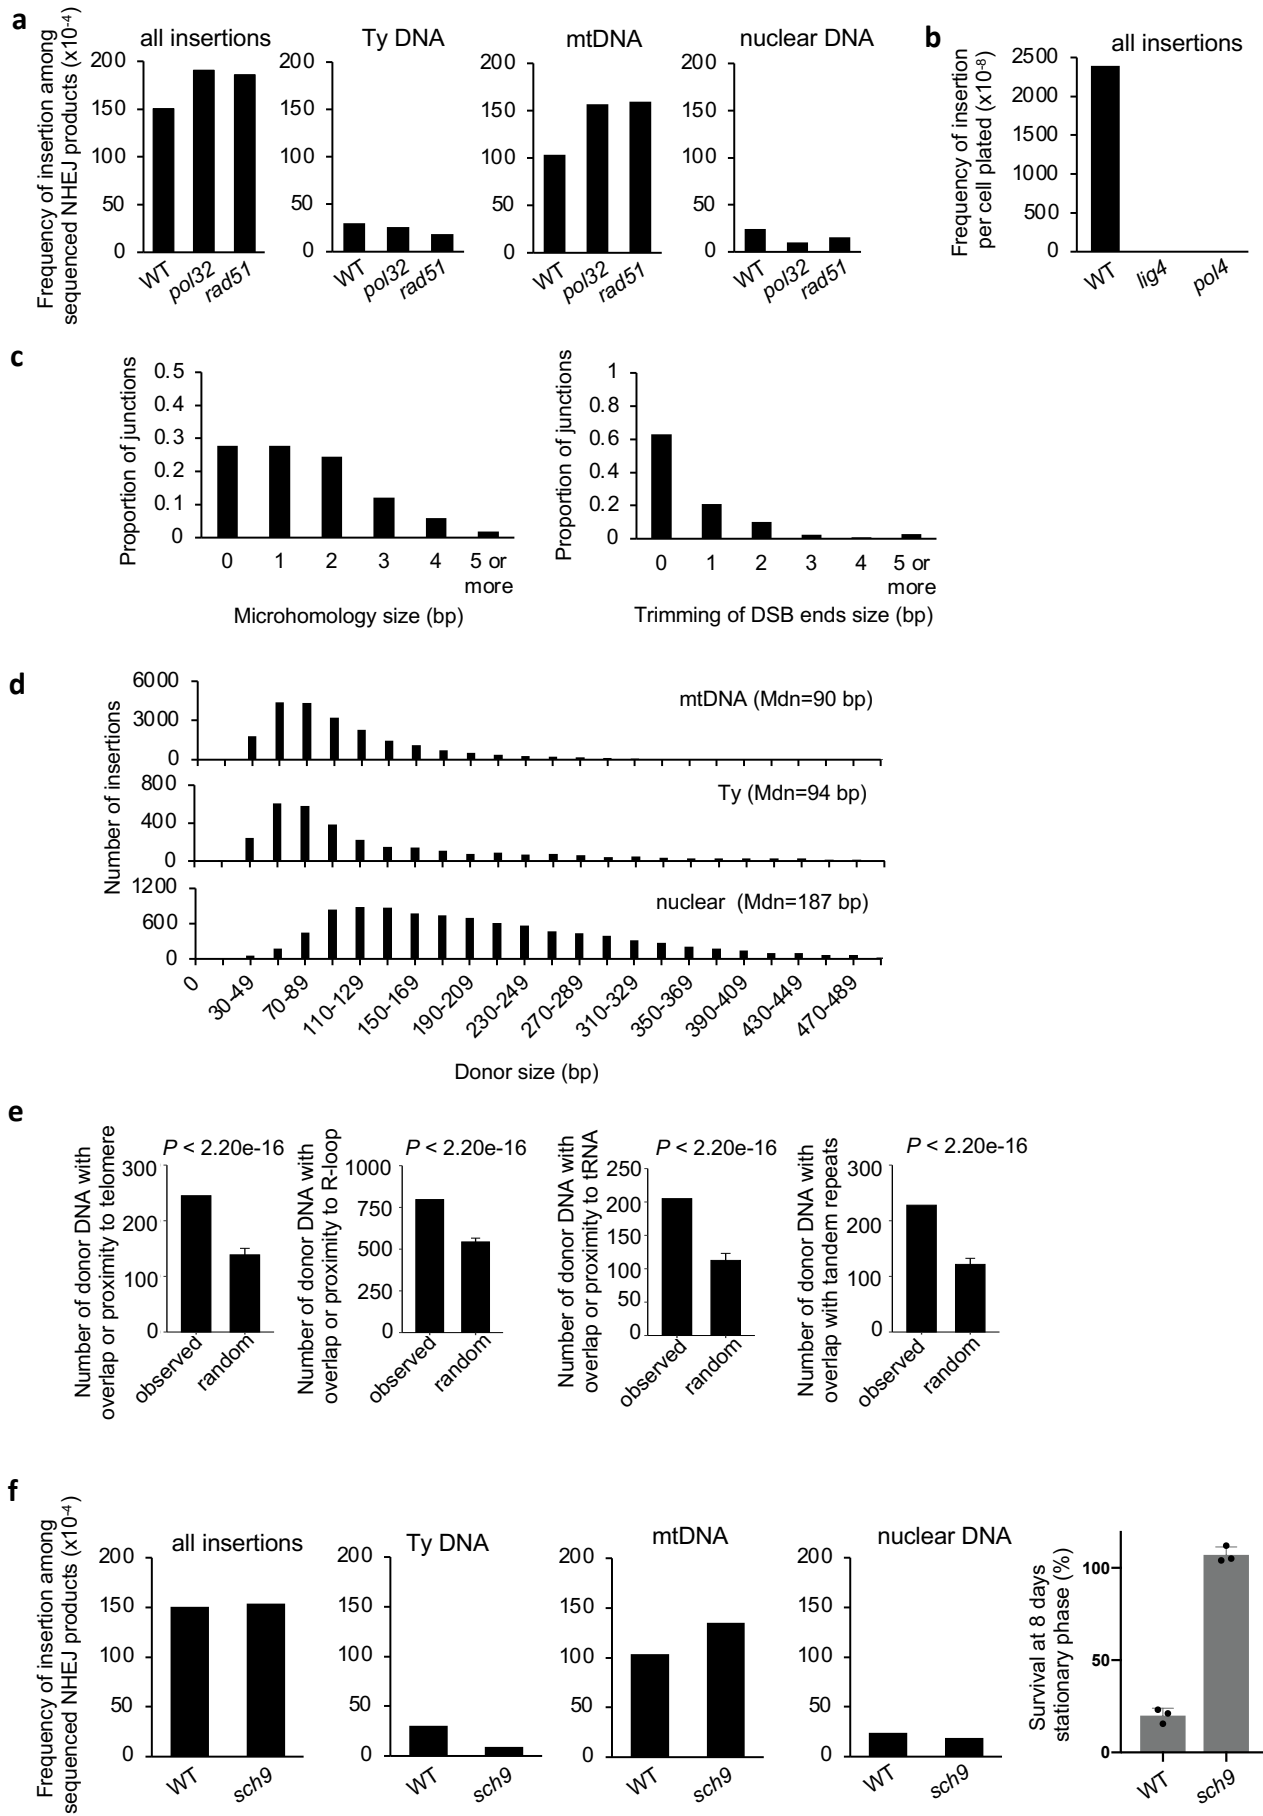

**Supplementary Figure 3. Analysis of templated insertions in mutants affecting DNA repair and aging**

**a**, Frequency and types of DNA inserted at DSBs in *rad51Δ* and *pol32Δ* (n - number of NHEJ products analyzed is shown in Table S1).

**b**, Frequency of DNA inserted at DSBs in *lig4Δ* and *pol4Δ* (n - number of cells plated is shown in Table S1).

**c**, Analysis of microhomology and DSB ends trimming at insertion junctions in 16 days wild-type stationary phase cells.

**d**, Insertion size analysis originating from mtDNA, Ty DNA, and nuclear genome.

**e**, Analysis of features of DNA inserted from nuclear genome at DSBs in wild-type stationary phase cells. Insertions observed in all days (3, 8, 16) were combined for this analysis. Insertions coming from Ty retrotransposons, mtDNA, rDNA, *MATa* or 2 $\mu$  plasmid were excluded from these analyses. P values were calculated using one-sided permutation test. Proximity is defined as sequence within 1 kb from ARS or telomere and within 0.2 kb from tRNA or R-loop.

**f**, Frequency and types of DNA inserted at DSBs in *sch9Δ* at 8 days in stationary phase (n- number of NHEJ products analyzed is shown in Supplementary Data 1). Viability of wild-type and *sch9Δ* cells at 8 days in stationary phase is shown on the right. Source data are provided as a Source Data file.



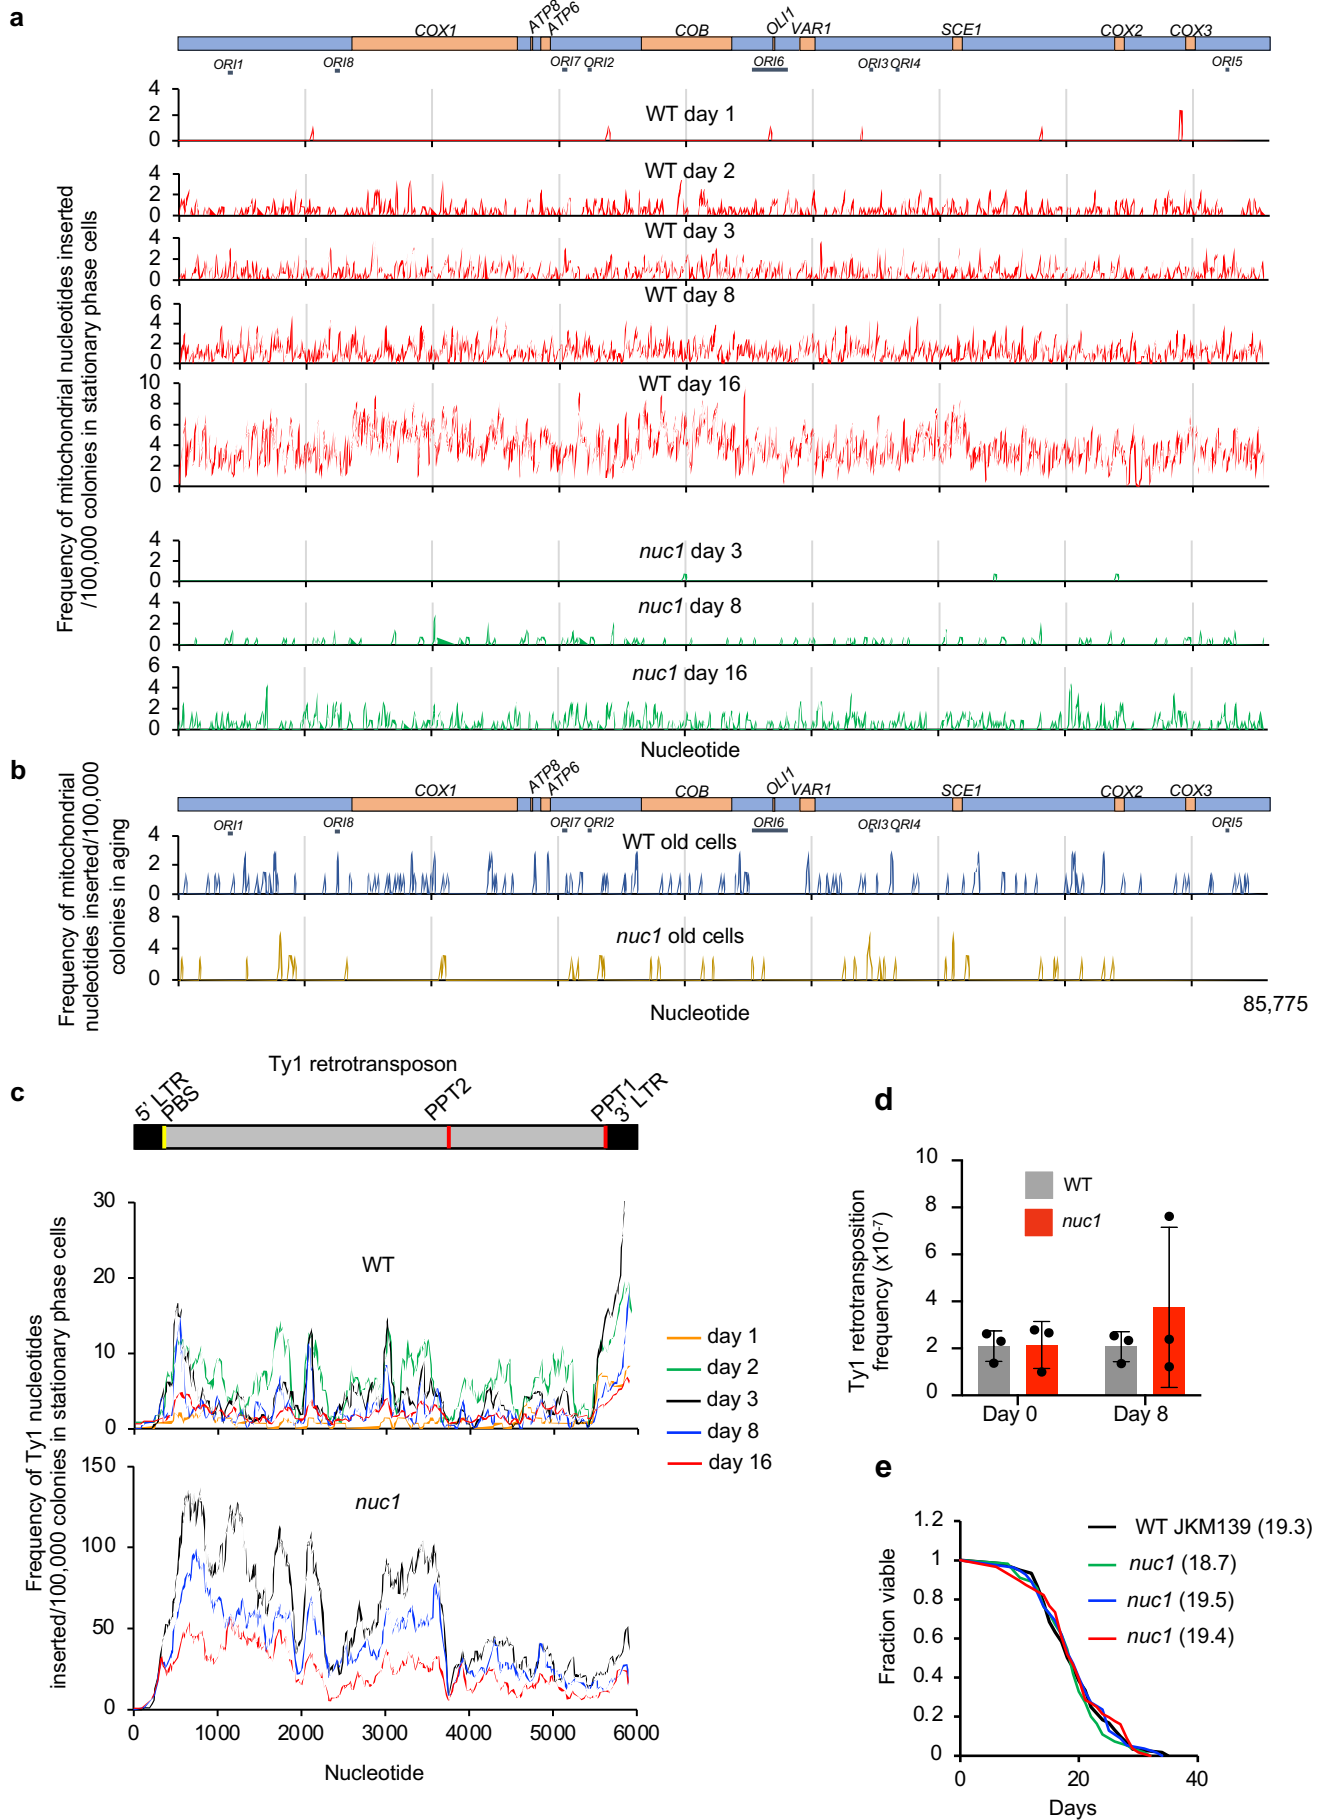

**Supplementary Figure 4. Analysis of mtDNA and Ty1 sequences inserted at DSB**

**a**, Analysis of sequences inserted at DSB from mtDNA in wild-type and *nuc1Δ* during stationary phase. A scheme of mtDNA genome, including positions of replication origin (ORI) and major ORFs, is shown.

**b**, Analysis of sequences inserted at DSB from mtDNA in wild-type and *nuc1Δ* in aged cells.

**c**, Analysis of sequences inserted at DSB from Ty1 in wild-type and *nuc1Δ* during stationary phase.

**d**, Transposition frequency in wild-type and *nuc1Δ* mutant in stationary phase cells, (mean  $\pm$  SD; n=3; n represents biological repeats.).

**e**, Analysis of lifespan of wild-type and three independent *nuc1Δ* mutant cells. Average lifespan in each strain is shown in parentheses. Source data are provided as a Source Data file.

**a**

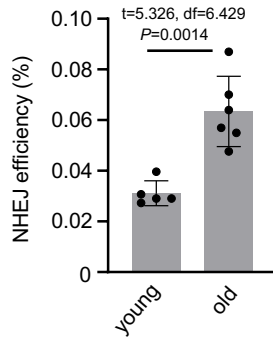

**b**

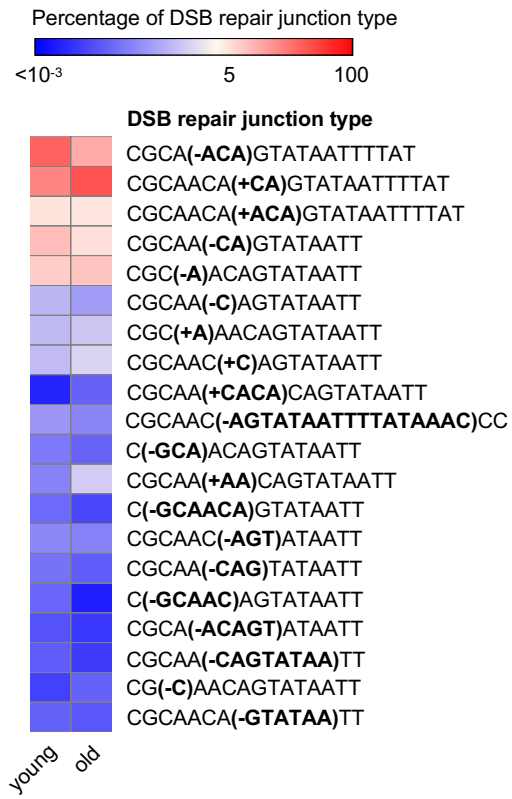

**Supplementary Figure 5. Analysis of indel junctions at repaired DSBs in old mother cells**

**a,** NHEJ efficiency during replicative aging. Mean values are plotted, error bars represent SD; n=5 for young cells and 6 for old cells. n represents biological repeats. P values determined using unpaired two-tailed Welch's t-test.

**b,** Analysis of top indel junctions among DSB repair products in growing young and old cells. Source data are provided as a Source Data file.

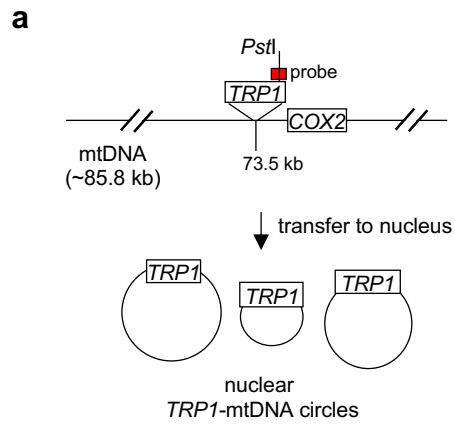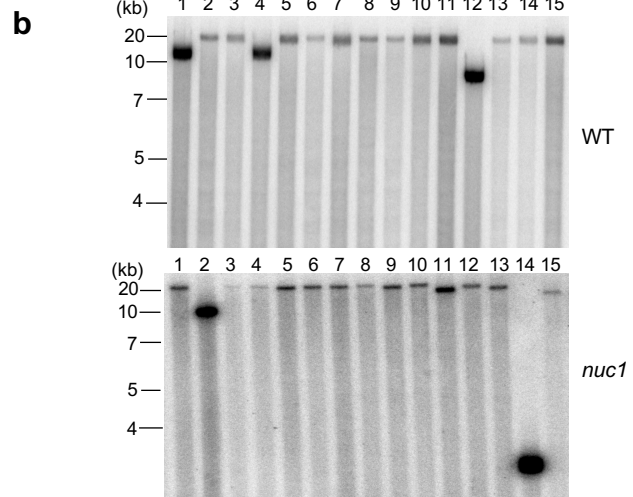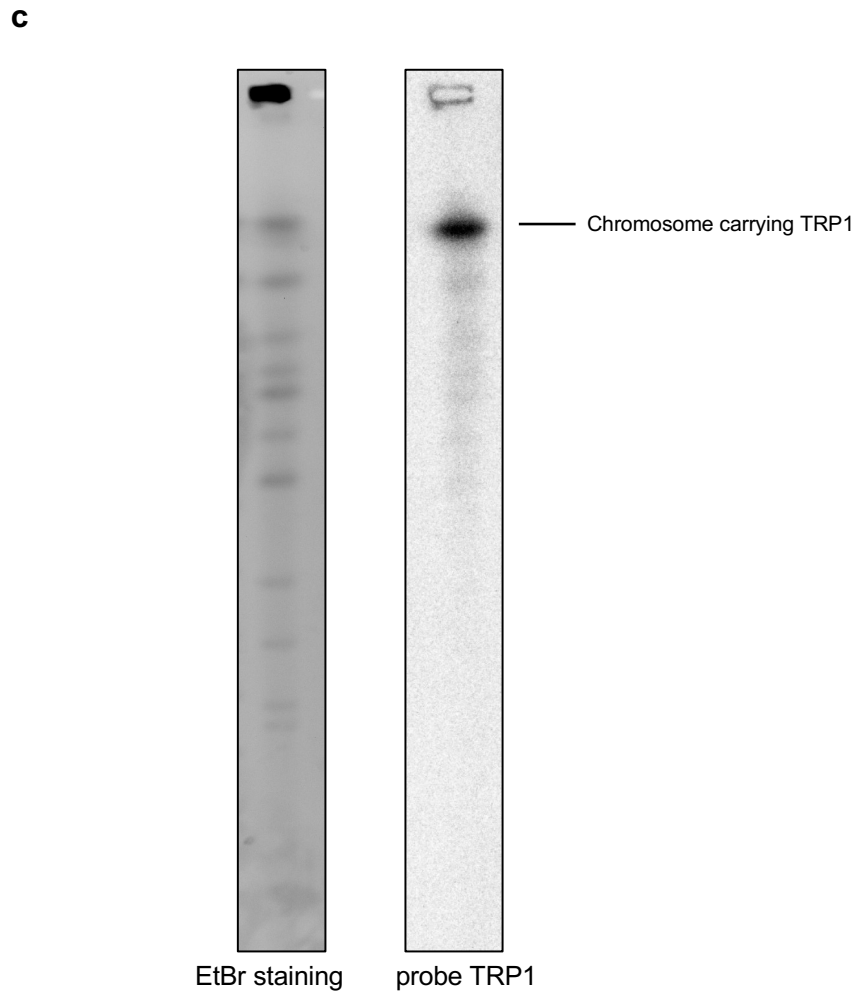

### Supplementary Figure 6. Analysis of nuclear *TRP1*-mtDNA

**a**, Schematic of mtDNA marked with *TRP1* and circular *TRP1*-mtDNA transferred to nucleus. DNA was digested with the *Pst*I restriction enzyme that cuts once 3' to the *TRP1* reporter inserted within mtDNA but not anywhere within the mtDNA itself. Southern blot analysis with a *TRP1*-specific probe is expected to show two fragments if mtDNA-*TRP1* were linear and one fragment if it were circular.

**b**, Southern blot analysis of nuclear *TRP1*-mtDNA digested with *Pst*I in wild-type and *nuc1*Δ cells. DNA probe location is indicated in **a**. 15 independent *TRP1*-mtDNA for each were analyzed. A single band was observed in all cases.

**c**, Southern blot analysis of a single colony carrying stable nuclear *TRP1*-mtDNA. Chromosomes were separated by CHEF and gel was stained with EtBr (left). Southern blot analysis of this gel with *TRP1* probe. Source data are provided as a Source Data file.

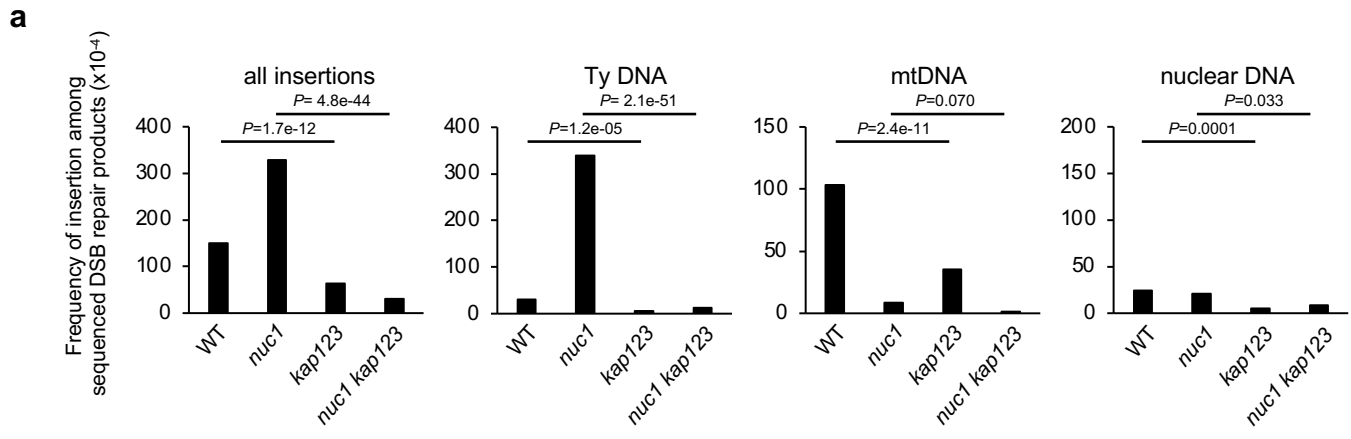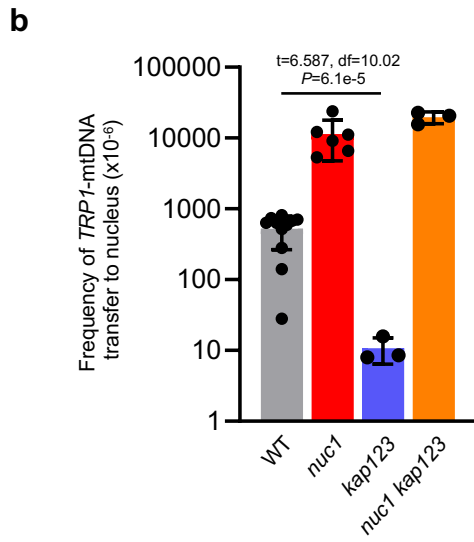

**Supplementary Figure 7. Analysis of Kap123 in transfer of mtDNA to nucleus**

**a,** Frequency and types of DNA inserted at DSBs in wild-type, *nuc1Δ*, *kap123Δ* and *nuc1Δ kap123Δ* at 8 days in stationary phase (P values were determined using two-tailed  $\chi^2$  test.

n - number of NHEJ products analyzed in shown in Table S1).

**b,** Frequency of Trp<sup>+</sup> colonies carrying nuclear *TRP1*-mtDNA in wild-type and indicated mutant cells, (mean  $\pm$  SD; n=11 for wild type, 6 for *nuc1Δ*, 3 for *kap123Δ* or *nuc1Δ kap123Δ* mutant. n represents biological repeats.; P values were determined using unpaired two-tailed Welch's t-test).

Source data are provided as a Source Data file.



**Supplementary Table 1. List of strains used in this study.**

| Strain name      | Parental strain | Genotype                                                                                                                     | Source                                                                     |
|------------------|-----------------|------------------------------------------------------------------------------------------------------------------------------|----------------------------------------------------------------------------|
| JKM139           |                 | DELho <i>hml::ADE1 MATa hmr::ADE1 ade1 leu2-3,112 lys5 trp1::hisG ura3-52 ade3::GAL10::HO</i>                                | [1]                                                                        |
| yYY363           | JKM139          | <i>nuc1::klTRP1</i>                                                                                                          | this study                                                                 |
| yYY661           | JKM139          | <i>nuc1-H138A</i>                                                                                                            | this study                                                                 |
| yYY337           | JKM139          | <i>sch9::klTRP1</i>                                                                                                          | this study                                                                 |
| yWH475           | JKM139          | <i>dna2::kanMX pif1-m2</i>                                                                                                   | [2]                                                                        |
| yYY387           | JKM139          | <i>pol32::natMX</i>                                                                                                          | this study                                                                 |
| yYY466           | JKM139          | <i>rad51::kanMX</i>                                                                                                          | this study                                                                 |
| yYY399           | JKM139          | <i>lig4::klTRP1</i>                                                                                                          | this study                                                                 |
| yYY400           | JKM139          | <i>pol4::klTRP1</i>                                                                                                          | this study                                                                 |
| yYY704           | JKM139          | <i>kap123::kanMX</i>                                                                                                         | this study                                                                 |
| yYY705           | JKM139          | <i>nuc1::klTRP1 kap123::kanMX</i>                                                                                            | this study                                                                 |
| yYY339           | JKM139          | <i>spt3::klTRP1</i>                                                                                                          | this study                                                                 |
| yYY587           | JKM139          | <i>nuc1::kanMX spt3::klTRP1</i>                                                                                              | this study                                                                 |
| PTY44            |                 | <i>MATa ura3-52 lys2 leu2-3,112 trp1-Δ1 [ρ+, TRP1]</i>                                                                       | [3]                                                                        |
| yYY583           | PTY44           | <i>nuc1::kanMX</i>                                                                                                           | this study                                                                 |
| yYY660           | PTY44           | <i>nuc1-H138A</i>                                                                                                            | this study,<br>constructed using<br>pCORE-UH                               |
| yYY706           | PTY44           | <i>kap123::kanMX</i>                                                                                                         | this study                                                                 |
| yYY707           | PTY44           | <i>nuc1::pCORE-UH kap123::kanMX</i>                                                                                          | this study                                                                 |
| yYY664           | PTY44           | <i>MATa ura3-52 lys2 leu2-3,112 trp1-Δ1 [ρ+, TRP1]</i>                                                                       | this study,<br>constructed using<br>HO plasmid to<br>switch mating<br>type |
| yYY671           | yYY664          | <i>nuc1::pCORE-UH</i>                                                                                                        | this study                                                                 |
| PTY44/<br>YY664  | PTY44           | <i>MATa/Matα ura3-52/ura3-52 lys2/lys2 leu2-3,112/ leu2-3,112 trp1-Δ1/trp1-Δ1 [ρ+, TRP1]</i>                                 | this study,<br>constructed by<br>mating PTY44<br>and yYY664                |
| yYY671/<br>YY583 | yYY583          | <i>MATa/Matα ura3-52/ura3-52 lys2/lys2 leu2-3,112/ leu2-3,112 trp1-Δ1/trp1-Δ1 [ρ+, TRP1] nuc1::kanMX/<br/>nuc1::pCORE-UH</i> | this study,<br>constructed by<br>mating yYY671<br>and yYY583               |
| DG1657           |                 | <i>MATa ura3-167 his3Δ-200 trp1-hisG leu2-hisG Ty1-270his3-AI Ty1-588neo Ty1-146[tyb1::lacZ]</i>                             | [4]                                                                        |
| yJL67            | DG1657          | <i>nuc1::klTRP1</i>                                                                                                          | this study                                                                 |

**Supplementary Table 2. List of DNA oligos used in this study.**

| Name                                                                                                            | Sequence(5' to 3')                                                            | Comments                                                                                                                         |
|-----------------------------------------------------------------------------------------------------------------|-------------------------------------------------------------------------------|----------------------------------------------------------------------------------------------------------------------------------|
| <b>A. Primers for amplification of the <i>MATa</i> locus for <i>Break-In</i> sequencing</b>                     |                                                                               |                                                                                                                                  |
| mata-xxx-F1                                                                                                     | TCGTCGGCAGCGTCAGATGTGTATAAGAGACAGxxxGCATAGTCGGGTTT<br>TTCCTTTAGTTTCAGC        | To amplify the <i>MATa</i> locus for <i>Break-In</i> sequencing. 11/18 bp from HO cut site (Fig. 1b). xxx represents home index. |
| mata-xxx-R1                                                                                                     | GTCTCGTGGGCTCGGAGATGTGTATAAGAGACAGxxxCAACCACTCTACA<br>AAACCAAAACCAGGGT        |                                                                                                                                  |
| mata-xxx-F3                                                                                                     | TCGTCGGCAGCGTCAGATGTGTATAAGAGACAGxxxTGAGATCTAAATAA<br>ATTCGTTTTCAATGAT        |                                                                                                                                  |
| mata-xxx-R3                                                                                                     | GTCTCGTGGGCTCGGAGATGTGTATAAGAGACAGxxxCGTCACCACGTAC<br>TTCAGCATAATTATTCG       |                                                                                                                                  |
| <b>B. Primers for amplification of DNA probes used for Southern blot</b>                                        |                                                                               |                                                                                                                                  |
| TRP1-Fw                                                                                                         | GACTGACGCCAGAAAATGTTGG                                                        | Supplementary Figure 6                                                                                                           |
| TRP1-Rw                                                                                                         | CAAGAATCGGGTCATTGTAGCG                                                        | Supplementary Figure 6                                                                                                           |
| Typeak fw                                                                                                       | CGCAGTATCCATCATCAGTTG                                                         | Fig. 5c probe A                                                                                                                  |
| Typeak rv                                                                                                       | AAGTGTATACAAGAAGGTGAGTTC                                                      | Fig. 5c probe A                                                                                                                  |
| mtDNA F1                                                                                                        | CACCACTAATTGAAAACCTGTCTG                                                      | Fig. 4d                                                                                                                          |
| mtDNA R2                                                                                                        | AACCGTACGTGCGACTTTCATC                                                        | Fig. 4d                                                                                                                          |
| ACT1-fw                                                                                                         | TCTTCCATCTATCGTCGGTAGAC                                                       | Fig. 4d, 5c loading control                                                                                                      |
| ACT1 rv                                                                                                         | GGTCAATACGGCAGATTCC                                                           | Fig. 4d, 5c loading control                                                                                                      |
| TRA1 fw                                                                                                         | GTCCTAATACGACTTTTCAAATGTCTTTATGTCCGTC                                         | Fig. 4d, 5c loading control                                                                                                      |
| TRA1 rv                                                                                                         | ATACTTGTAAGCACTCTTCTGTAGTGAATATCACTTTTG                                       | Fig. 4d, 5c loading control                                                                                                      |
| TOM1 fw                                                                                                         | CTCAAAAATTGAAGATCATG                                                          | Fig. 4d, 5c loading control                                                                                                      |
| TOM1 rv                                                                                                         | CGATTGATTGAGCGATGATG                                                          | Fig. 4d, 5c loading control                                                                                                      |
| <b>C. Primers for making point mutants</b>                                                                      |                                                                               |                                                                                                                                  |
| Nuc1-pCORE-Fw                                                                                                   | CTTATCCACCTACCCAGAAAACCTAATAGTAATATTCAATCTCACTCTTTC<br>TTCGTACGCTGCAGGTCGAC   |                                                                                                                                  |
| Nuc1-pCORE-Rw                                                                                                   | GCTGTTGGTGCTTCTGCAACAATCAATTTAAAAAAGTGC GTTGGAAACAG<br>CCC GCGGTTGGCCGATTTCAT |                                                                                                                                  |
| Nuc1-F5                                                                                                         | ATGTGCAGTAGGATACTCTTGT                                                        |                                                                                                                                  |
| Nuc1-R5                                                                                                         | AAGTTCTAGCCAGTACTTCTC                                                         |                                                                                                                                  |
| <b>D. Primers for amplification of the 84-1000 bp fragments for transformation/insertion analysis (Fig. 4f)</b> |                                                                               |                                                                                                                                  |
| Lambda-84-Fw                                                                                                    | AACACGGTGGGCTCAGAGAATCC                                                       |                                                                                                                                  |
| Lambda-84-Rw                                                                                                    | TGTTAGGATGACACTGTACTGACCGT                                                    |                                                                                                                                  |
| Lambda-100-Fw                                                                                                   | AACATGGGCACGCTGGAGAC                                                          |                                                                                                                                  |
| Lambda-100-Rw                                                                                                   | TGTTGCGGTATCAGGACGACCAATA                                                     |                                                                                                                                  |
| Lambda-150-Fw                                                                                                   | AACATGCTGATTAAGGCAGAGGCTGC                                                    |                                                                                                                                  |
| Lambda-150-Rw                                                                                                   | TGTTGCGGCGGCTTCAAGCGCAA                                                       |                                                                                                                                  |
| Lambda-200-Fw                                                                                                   | AACAGGCGTTTCCGTTCTTCTTC                                                       |                                                                                                                                  |
| Lambda-200-Rw                                                                                                   | TGTTACGGATACTCGCACCGAA                                                        |                                                                                                                                  |
| Lambda-300-Fw                                                                                                   | AACAGGACAAAAATGCGCAGCA                                                        |                                                                                                                                  |
| Lambda-300-Rw                                                                                                   | TGTTGCTCAGCAGGGCAGCATGAG                                                      |                                                                                                                                  |
| Lambda-400-Fw2                                                                                                  | AACAGTGCTACCCGAACACGGC                                                        |                                                                                                                                  |
| Lambda-400-Rw2                                                                                                  | TGTTGCTGAGCACATCCCACGCC                                                       |                                                                                                                                  |
| Lambda-500-Fw2                                                                                                  | AACAACGACGGCAGCAACGG                                                          |                                                                                                                                  |
| Lambda-500-Rw2                                                                                                  | TGTTGCATTCATTCAAGTGTTCCTGCC                                                   |                                                                                                                                  |
| Lambda-1k-Fw                                                                                                    | AACAGGCTTCGCTCACTGTTTCAGG                                                     |                                                                                                                                  |
| Lambda-1k-Rw                                                                                                    | TGTTCCCTTCGTTTTTCATCCAGTC                                                     |                                                                                                                                  |
| <b>E. Primers for amplification of the 24-84 bp fragments for transformation/insertion analysis (Fig. 4f)</b>   |                                                                               |                                                                                                                                  |
| M13-X-24-Fw                                                                                                     | AACACTGGTAAACAAGGGTTAACA                                                      |                                                                                                                                  |
| M13-X-24-Rw                                                                                                     | TGTTAACCTTGTTTACCAGTGT                                                        |                                                                                                                                  |
| M13-X-34-Fw                                                                                                     | AACATTATCGAACACTGGTAAACAAGGGTTAACA                                            |                                                                                                                                  |
| M13-X-34-Rw                                                                                                     | TGTTAACCTTGTTTACCAGTGTTCGATAATGTT                                             |                                                                                                                                  |
| M13-X-44-Fw                                                                                                     | AACAATTTTGAACATTATCGAACACTGGTAAACAAGGGTTAACA                                  |                                                                                                                                  |
| M13-X-44-Rw                                                                                                     | TGTTAACCTTGTTTACCAGTGTTCGATAATGTTCAAAAATTGTT                                  |                                                                                                                                  |

|             |                                                                                  |  |
|-------------|----------------------------------------------------------------------------------|--|
| M13-X-54-Fw | AACAGCCTCTAACAAATTTGAACATTATCGAACACTGGTAAACAAGGGT<br>TAACA                       |  |
| M13-X-54-Rw | TGTTAACCCCTTGTTTACCAGTGTTTCGATAATGTTCAAAAATTGTTAGAGGC<br>TGTT                    |  |
| M13-X-64-Fw | AACATTTTGCAACAGCCTCTAACAAATTTGAACATTATCGAACACTGGTA<br>AAACAAGGGTAAACA            |  |
| M13-X-64-Rw | TGTTAACCCCTTGTTTACCAGTGTTTCGATAATGTTCAAAAATTGTTAGAGGC<br>TGTTGCAAAAATGTT         |  |
| M13-X-74-Fw | AACAGCAAAAAACATTTTGCAACAGCCTCTAACAAATTTGAACATTATC<br>GAACACTGGTAAACAAGGGTAAACA   |  |
| M13-X-74-Rw | TGTTAACCCCTTGTTTACCAGTGTTTCGATAATGTTCAAAAATTGTTAGAGGC<br>TGTTGCAAAAATGTTTTTCTGTT |  |

## Supplementary References

1. Moore, J.K., and Haber, J.E. (1996). Cell cycle and genetic requirements of two pathways of nonhomologous end-joining repair of double-strand breaks in *Saccharomyces cerevisiae*. *Mol Cell Biol* *16*, 2164-2173.
2. Zhu, Z., Chung, W.H., Shim, E.Y., Lee, S.E., and Ira, G. (2008). Sgs1 helicase and two nucleases dna2 and exo1 resect DNA double-strand break ends. *Cell* *134*, 981-994.
3. Thorsness, P.E., and Fox, T.D. (1993). Nuclear mutations in *Saccharomyces cerevisiae* that affect the escape of DNA from mitochondria to the nucleus. *Genetics* *134*, 21-28. [10.1093/genetics/134.1.21](https://doi.org/10.1093/genetics/134.1.21).
4. Sundararajan, A., Lee, B.S., and Garfinkel, D.J. (2003). The Rad27 (Fen-1) nuclease inhibits Ty1 mobility in *Saccharomyces cerevisiae*. *Genetics* *163*, 55-67.
