# Supplementary material for: Yeast EndoG prevents genome instability by degrading extranuclear DNA species
Source: PubMed Central journal article supplement — Nat Commun. 2024 Sep 3;15:7653. doi: 10.1038/s41467-024-52147-2 (PMC11372161; doi:10.1038/s41467-024-52147-2), 2024-09-03
Supplement: 41467_2024_52147_MOESM3_ESM.pdf [file 41467_2024_52147_MOESM3_ESM.pdf]

## **Description of Additional Supplementary Files**

File name: Supplementary Data 1

Description: Frequency and types of DNA insertions in wild-type and mutants. Number of cells plated and NHEJ products analyzed per strain are provided.
